# Supplementary material for: A simple preparation method of in situ oxidized titanium carbide MXene for photocatalytic degradation of catechol
Source: Royal Society of Chemistry journal article supplement (doi:10.1039/d2nj01033j), 2022-01-01
Supplement: d2nj01033j1.pdf [file d2nj01033j1.pdf]

# Simple preparation of in-situ oxidized titanium carbide Mxene for photocatalytic degradation of catechol

Zhifang Wu<sup>#1</sup>, Wencai Fu<sup>#1</sup>, Huixia Xu<sup>1</sup>, Zheng Rui<sup>1</sup>, Fangjie Han<sup>1</sup>, Zhishan Liang<sup>1</sup>, Dongfang Han<sup>1</sup>, Dongxue Han<sup>\*1</sup>, Fenghua Li<sup>\*2</sup> and Li Niu<sup>1</sup>

<sup>1</sup> School of Civil Engineering c/o Center for Advanced Analytical Science, School of Chemistry and Chemical Engineering, Guangzhou University, Guangzhou 510006, P. R. China.

<sup>2</sup> State Key Laboratory of Electroanalytical Chemistry, Changchun Institute of Applied Chemistry, Chinese Academy of Sciences, Changchun 130022, China

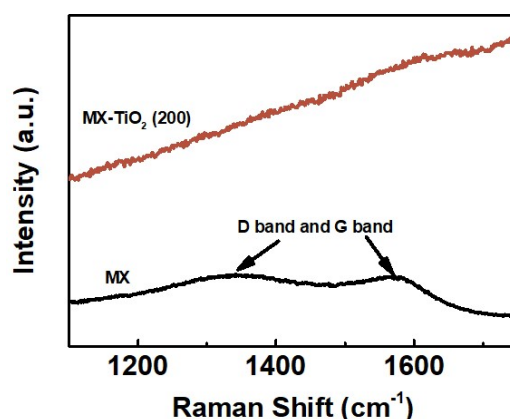

Fig.S1 Raman spectra of as-prepared MX and MX-TiO<sub>2</sub>(200) powder

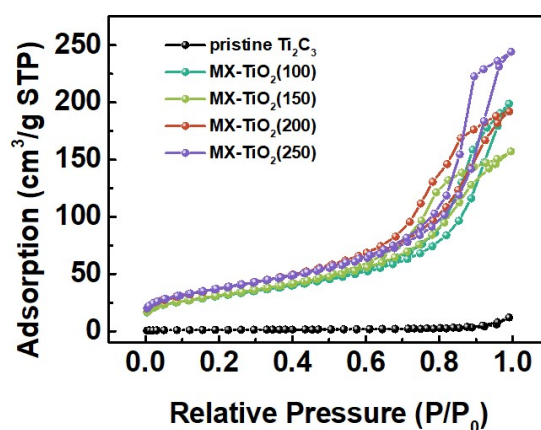

Fig.S2 Nitrogen adsorption-desorption isotherms for as-prepared and H<sub>2</sub>O<sub>2</sub> treated MX.

Table S1 The BET surface area of the as prepared MX and H<sub>2</sub>O<sub>2</sub> treated MX

| Photocatalyst             | BET Surface Area (m <sup>2</sup> /g) |
|---------------------------|--------------------------------------|
| MX                        | 4.18                                 |
| MX-TiO <sub>2</sub> (100) | 109.78                               |
| MX-TiO <sub>2</sub> (150) | 113.59                               |
| MX-TiO <sub>2</sub> (200) | 135.30                               |
| MX-TiO <sub>2</sub> (250) | 139.45                               |

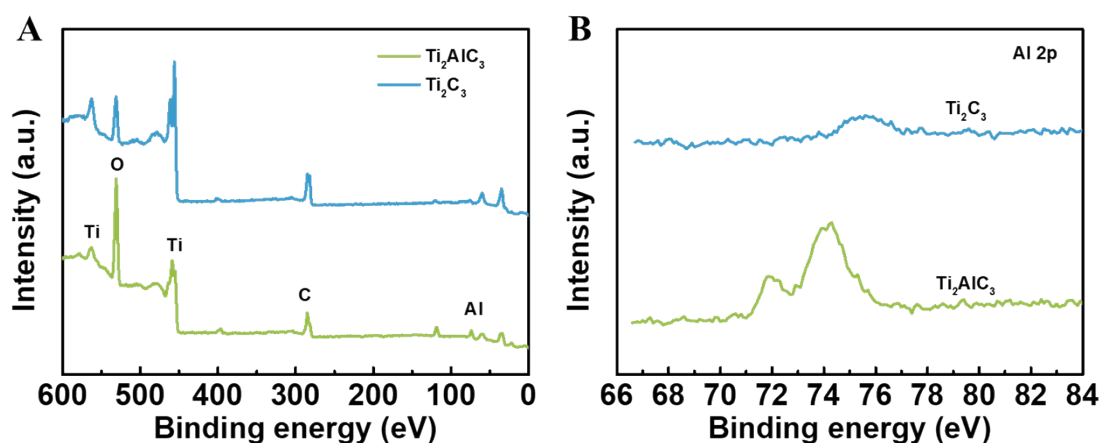

Figure S3 XPS survey spectra (A) and high-resolution XPS spectra of Al 2p (B) for Ti<sub>3</sub>AlC<sub>2</sub> and Ti<sub>3</sub>C<sub>2</sub>.

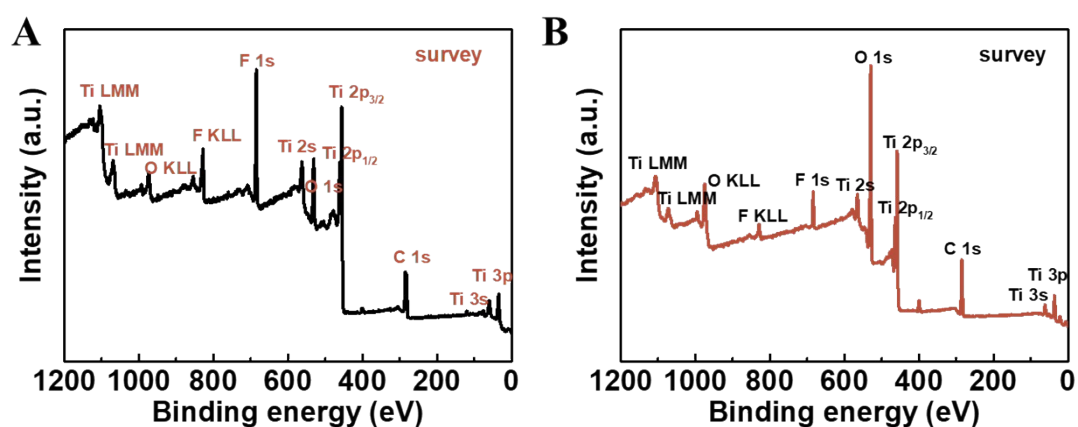

Fig.S4 XPS survey spectra: (A) as-prepared MX; (B) H<sub>2</sub>O<sub>2</sub> treated MX-TiO<sub>2</sub>(200).

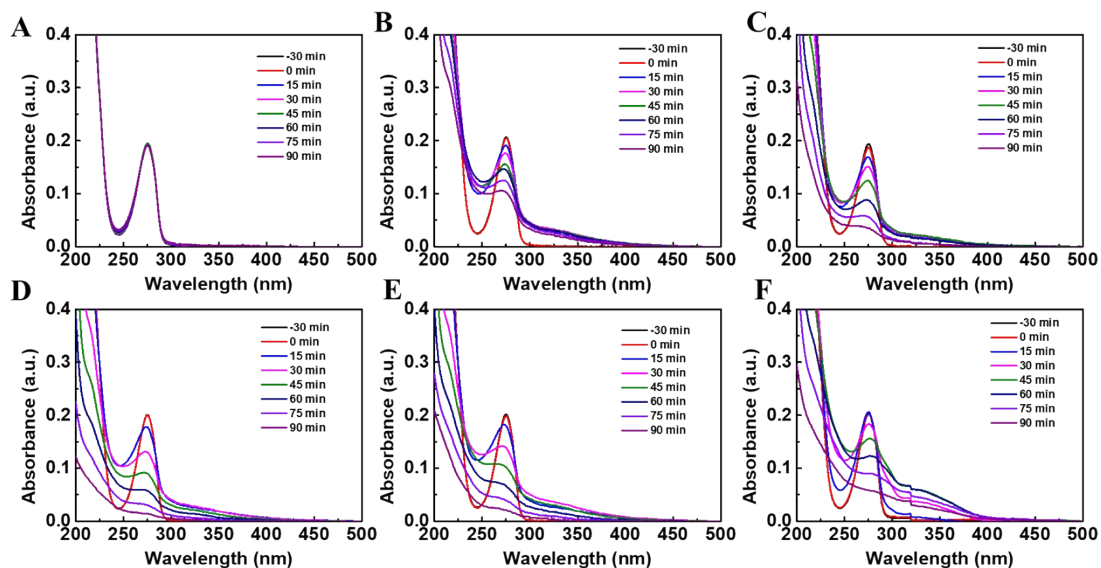

Fig.S5 The as-prepared photocatalysts (A) pristine MX, (B) MX-TiO<sub>2</sub>(100), (C) MX-TiO<sub>2</sub>(150), (D) MX-TiO<sub>2</sub>(200), (E) MX-TiO<sub>2</sub>(250), and (F) TiO<sub>2</sub> UV-vis absorption spectra of the degradation process of CC.

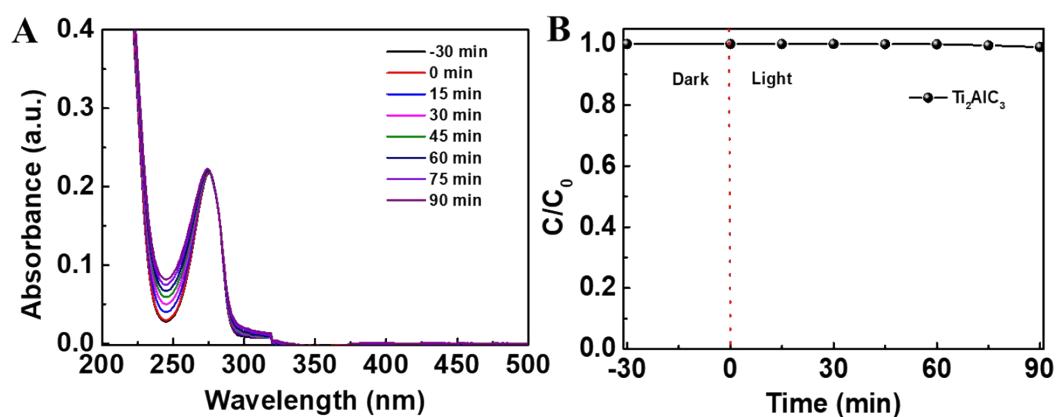

Fig.S6 The as-prepared Ti<sub>2</sub>AlC<sub>3</sub> (A) UV-vis absorption spectra of the degradation process of CC (B) photocatalytic degradation efficiency of CC.

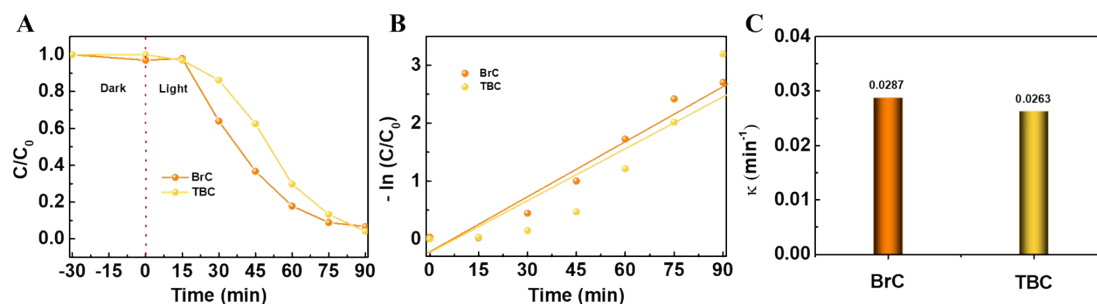

Fig.S7 The MX-TiO<sub>2</sub>(200) (A) photocatalytic degradation efficiency of BrC and TBC; (B) the first-order kinetics of BrC and TBC degradation; (C) the degradation rate constant of BrC and TBC.

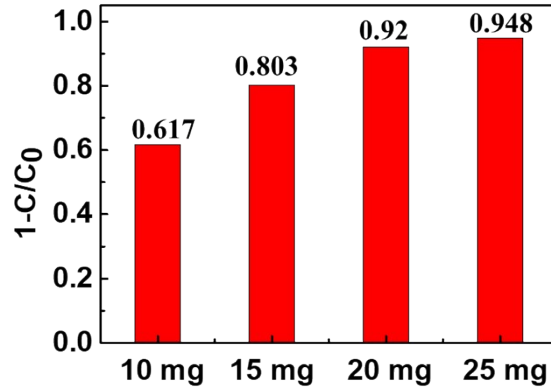

Fig. S8 Different dosage as-prepared photocatalysts photocatalytic degradation of CC.

Table S2 The calculated degradation rate and Pseudo-first-order kinetic model for catalysts

| Photocatalyst             | Degradation percentage | Rate constants (k; min <sup>-1</sup> ) | R <sup>2</sup> |
|---------------------------|------------------------|----------------------------------------|----------------|
| MX-TiO <sub>2</sub> (100) | 49.7                   | 0.0068                                 | 0.99           |
| MX-TiO <sub>2</sub> (150) | 81.3                   | 0.0152                                 | 0.94           |
| MX-TiO <sub>2</sub> (200) | 92.1                   | 0.0243                                 | 0.97           |
| MX-TiO <sub>2</sub> (250) | 89.6                   | 0.0214                                 | 0.97           |
| TiO <sub>2</sub>          | 71.5                   | 0.0108                                 | 0.92           |

Table S3 Summary of the CC photocatalytic efficiencies of previous compared to this research

| photocatalysts                                   | Catalyst mass (mg) | Irradiation time (min) | Degradation efficiency (%) | Ref.           |
|--------------------------------------------------|--------------------|------------------------|----------------------------|----------------|
| BiOCl                                            | 100                | 120                    | 65                         | 1 <sup>1</sup> |
| ZnO                                              | 20                 | 98                     | 69.8                       | 2 <sup>2</sup> |
| TiO <sub>2</sub>                                 | 50                 | 180                    | 40                         | 3 <sup>3</sup> |
| Ti <sub>3</sub> C <sub>2</sub> -TiO <sub>2</sub> | 20                 | 90                     | 92                         | This work      |

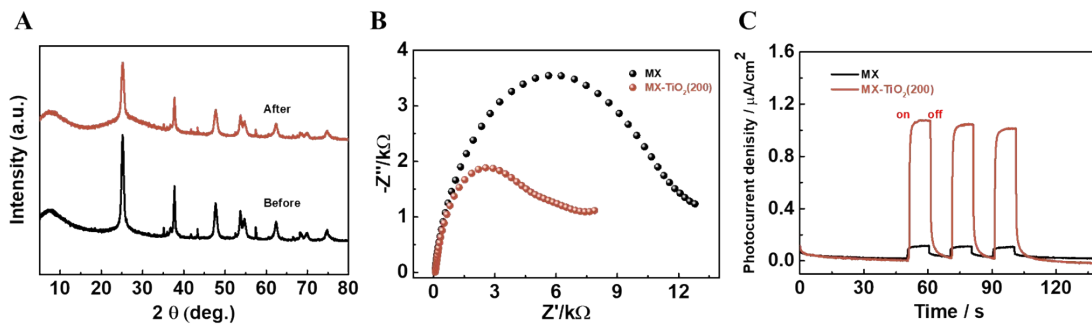

Fig. S9 (A) XRD patterns of before and after used MX-TiO<sub>2</sub>(200) (B) EIS spectra and (C) Photocurrent curves of MX and MX-TiO<sub>2</sub> (200).

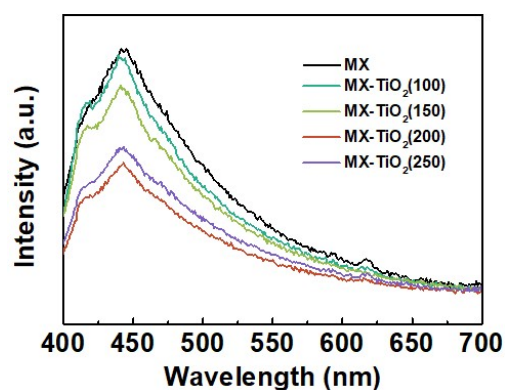

Fig. S10 PL spectra of as prepared and H<sub>2</sub>O<sub>2</sub> treated MX.

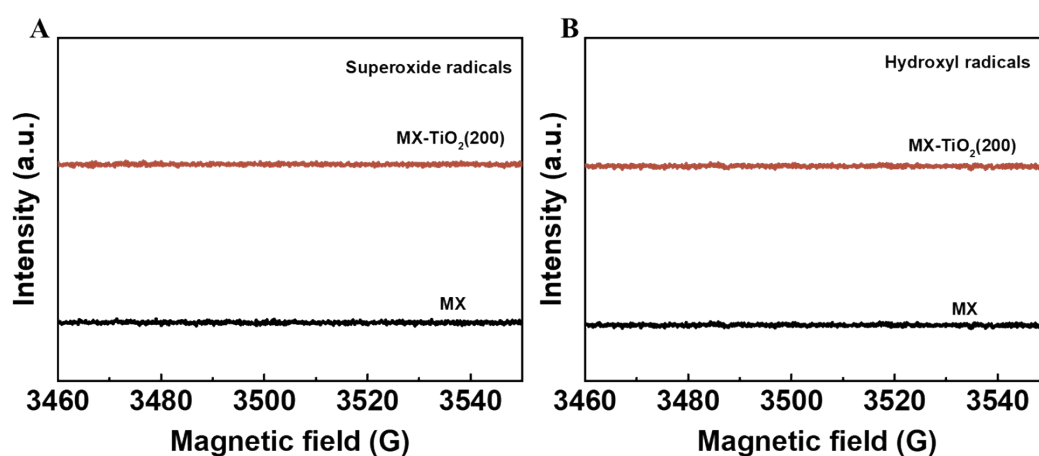

Fig. S11 ESR spectra of radicals trapped by DMPO in the presence of MX and MX-TiO<sub>2</sub>(200) in the dark: DMPO-•O<sub>2</sub><sup>-</sup> (A), DMPO-•OH (B).

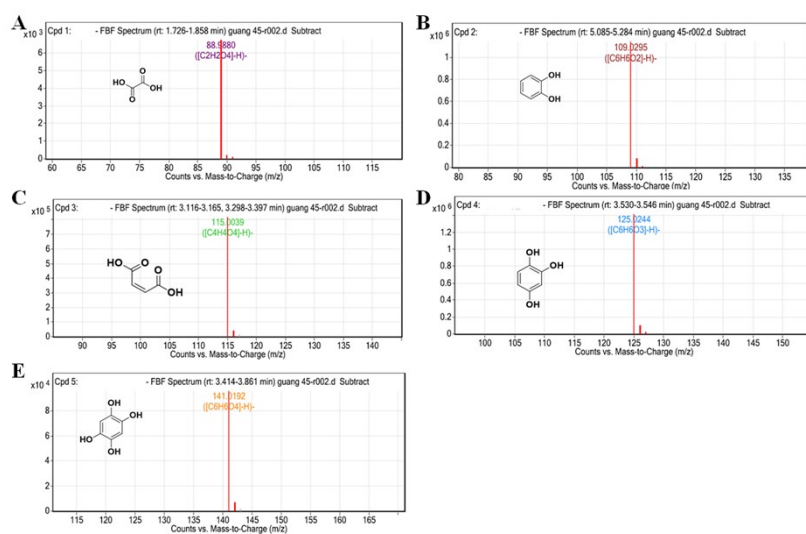

Fig. S12 Fragment chart photocatalytic main intermediate of the 45 min photocatalytic products by HPLC/MS.

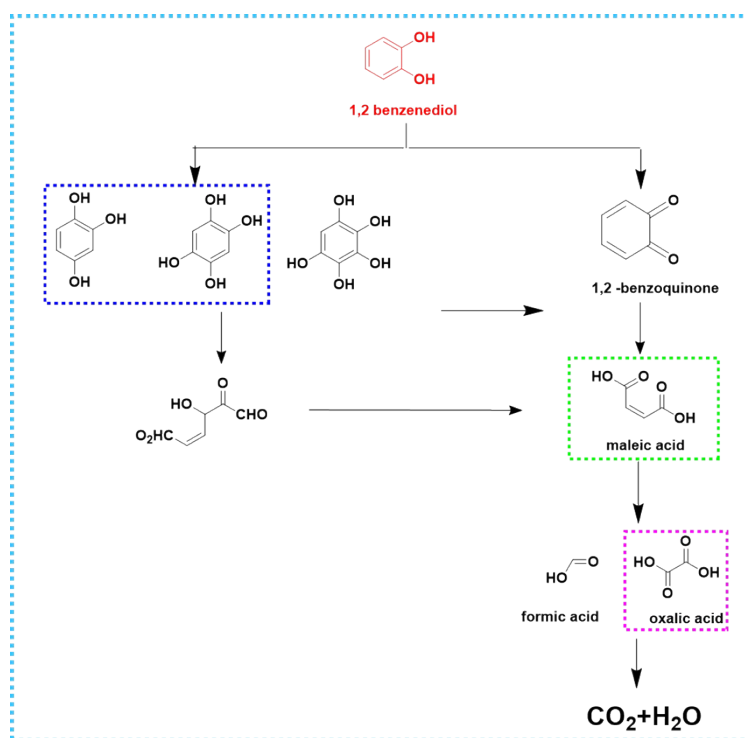

Fig.S13 Proposed photocatalytic degradation pathway of CC under simulated sunlight irradiation (MX-TiO<sub>2</sub>(200)).

### References

1. M. Li, Y. Jin, J. Su and J. Shen, *J. Adv. Oxid. Technol.*, 2017, **20**, 20160193.
2. E. Bazrafshan, T. J. Al-Musawi, M. F. Silva, A. H. Panahi, M. Havangi and F. K. Mostafapur, *Microchem. J.*, 2019, **147**, 643-653.
3. A. Sobczynski and L. Duczmal, *React. Kinet. Catal. Lett.*, 2004, **82**, 213-218.
